# Supplementary material for: Orchestration of microtubules and the actin cytoskeleton in trichome cell shape determination by a plant-unique kinesin
Source: eLife. 2015 Aug 19;4:e09351. doi: 10.7554/eLife.09351 (PMC4574192; doi:10.7554/eLife.09351)
Supplement: Figure 1—source data 1. — DOI: http://dx.doi.org/10.7554/eLife.09351.004 [file elife09351s001.xls]

## Sheet: Sheet1
Figure 1-source data 1. Distribution of the velocity and the run length of GFP-KCBP moving along cortical MTs.
Velocity [μm/min]	Run length [μm]
0	0
0	0		Velocity [μm/min]	0	0-0.6	0.6-1.2	1.2-1.8	1.8-2.4	2.4-3.0	3.0-3.6	3.6-4.2	4.2-4.8	>4.8
0	0		Counts	267	155	103	34	44	16	4	7	6	11
0	0
0	0
0	0
0	0
0	0
0	0
0	0
0	0
0	0
0	0
0	0
0	0
0	0
0	0
0	0
0	0
0	0
0	0
0	0
0	0
0	0
0	0
0	0
0	0		Run length [μm]	0	0-0.2	0.2-0.4	0.4-0.6	0.6-0.8	0.8-1.0	1.0-1.2	1.2-1.4	1.4-1.6	>1.6
0	0		Counts	267	215	85	34	22	13	2	1	3	5
0	0
0	0
0	0
0	0
0	0
0	0
0	0
0	0
0	0
0	0
0	0
0	0
0	0
0	0
0	0
0	0
0	0
0	0
0	0
0	0
0	0
0	0
0	0
0	0
0	0
0	0
0	0
0	0
0	0
0	0
0	0
0	0
0	0
0	0
0	0
0	0
0	0
0	0
0	0
0	0
0	0
0	0
0	0
0	0
0	0
0	0
0	0
0	0
0	0
0	0
0	0
0	0
0	0
0	0
0	0
0	0
0	0
0	0
0	0
0	0
0	0
0	0
0	0
0	0
0	0
0	0
0	0
0	0
0	0
0	0
0	0
0	0
0	0
0	0
0	0
0	0
0	0
0	0
0	0
0	0
0	0
0	0
0	0
0	0
0	0
0	0
0	0
0	0
0	0
0	0
0	0
0	0
0	0
0	0
0	0
0	0
0	0
0	0
0	0
0	0
0	0
0	0
0	0
0	0
0	0
0	0
0	0
0	0
0	0
0	0
0	0
0	0
0	0
0	0
0	0
0	0
0	0
0	0
0	0
0	0
0	0
0	0
0	0
0	0
0	0
0	0
0	0
0	0
0	0
0	0
0	0
0	0
0	0
0	0
0	0
0	0
0	0
0	0
0	0
0	0
0	0
0	0
0	0
0	0
0	0
0	0
0	0
0	0
0	0
0	0
0	0
0	0
0	0
0	0
0	0
0	0
0	0
0	0
0	0
0	0
0	0
0	0
0	0
0	0
0	0
0	0
0	0
0	0
0	0
0	0
0	0
0	0
0	0
0	0
0	0
0	0
0	0
0	0
0	0
0	0
0	0
0	0
0	0
0	0
0	0
0	0
0	0
0	0
0	0
0	0
0	0
0	0
0	0
0	0
0	0
0	0
0	0
0	0
0	0
0	0
0	0
0	0
0	0
0	0
0	0
0	0
0	0
0	0
0	0
0	0
0	0
0	0
0	0
0	0
0	0
0	0
0	0
0	0
0	0
0	0
0	0
0	0
0	0
0	0
0	0
0	0
0	0
0	0
0	0
0	0
0	0
0	0
0	0
0	0
0	0
0	0
0	0
0	0
0	0
0.03787	0.09467
0.04303	0.09467
0.04733	0.09467
0.04855	0.09467
0.05117	0.09467
0.05737	0.09467
0.06311	0.09467
0.06529	0.09467
0.06529	0.09467
0.08232	0.09467
0.08606	0.09467
0.08606	0.09467
0.08606	0.09467
0.09965	0.09467
0.10519	0.09467
0.10519	0.09467
0.10519	0.09467
0.10519	0.09467
0.10519	0.09467
0.11137	0.09467
0.11833	0.09467
0.12215	0.09467
0.12622	0.09467
0.12622	0.09467
0.12622	0.09467
0.14564	0.09467
0.14564	0.09467
0.14564	0.09467
0.14564	0.09467
0.14564	0.09467
0.14564	0.09467
0.15147	0.09467
0.15778	0.09467
0.15778	0.09467
0.15778	0.09467
0.15778	0.09467
0.16706	0.09467
0.17212	0.09467
0.17212	0.09467
0.17212	0.09467
0.17212	0.09467
0.17212	0.09467
0.17212	0.09467
0.18933	0.09467
0.18933	0.09467
0.1993	0.09467
0.21037	0.09467
0.21037	0.09467
0.21037	0.09467
0.21037	0.09467
0.21037	0.09467
0.21037	0.09467
0.21037	0.09467
0.21037	0.09467
0.21037	0.09467
0.22275	0.09467
0.2272	0.09467
0.23667	0.09467
0.23667	0.09467
0.23667	0.09467
0.23667	0.09467
0.23667	0.09467
0.23667	0.09467
0.23667	0.09467
0.23667	0.09467
0.23667	0.09467
0.23667	0.09467
0.23667	0.09467
0.25818	0.09467
0.26115	0.09467
0.27048	0.09467
0.27048	0.09467
0.27048	0.09467
0.27048	0.09467
0.27048	0.09467
0.27048	0.09467
0.27048	0.09467
0.27048	0.09467
0.27048	0.09467
0.29895	0.09467
0.30293	0.09467
0.31556	0.09467
0.31556	0.09467
0.31556	0.09467
0.31556	0.09467
0.31556	0.09467
0.31556	0.09467
0.31556	0.09467
0.31556	0.09467
0.33659	0.09467
0.34424	0.09467
0.34424	0.09467
0.37867	0.09467
0.37867	0.09467
0.37867	0.09467
0.37867	0.09467
0.37867	0.09467
0.37867	0.09467
0.37867	0.09467
0.37867	0.09467
0.37867	0.09467
0.37867	0.09467
0.40571	0.09467
0.40571	0.09467
0.40571	0.09467
0.40571	0.09467
0.40571	0.09467
0.40571	0.09467
0.41159	0.09467
0.42074	0.09467
0.42074	0.09467
0.43692	0.09467
0.43692	0.09467
0.43692	0.09467
0.43692	0.09467
0.44549	0.09467
0.44549	0.09467
0.45079	0.09467
0.47333	0.09467
0.47333	0.09467
0.47333	0.09467
0.47333	0.09467
0.47333	0.09467
0.47333	0.09467
0.47333	0.09467
0.47333	0.09467
0.47333	0.09467
0.47333	0.09467
0.47333	0.09467
0.47333	0.09467
0.47333	0.09467
0.47333	0.09467
0.47333	0.09467
0.47333	0.09467
0.47333	0.09467
0.47333	0.09467
0.47333	0.09467
0.47333	0.09467
0.47333	0.09467
0.51636	0.09467
0.54095	0.09467
0.54095	0.18933
0.54095	0.18933
0.54095	0.18933
0.54095	0.18933
0.54095	0.18933
0.54095	0.18933
0.54095	0.18933
0.54095	0.18933
0.54095	0.18933
0.56099	0.18933
0.568	0.18933
0.568	0.18933
0.58256	0.18933
0.58256	0.18933
0.63111	0.18933
0.63111	0.18933
0.63111	0.18933
0.63111	0.18933
0.63111	0.18933
0.63111	0.18933
0.63111	0.18933
0.63111	0.18933
0.63111	0.18933
0.63111	0.18933
0.63111	0.18933
0.63111	0.18933
0.63111	0.18933
0.63111	0.18933
0.63111	0.18933
0.63111	0.18933
0.63111	0.18933
0.63111	0.18933
0.63111	0.18933
0.63111	0.18933
0.63111	0.18933
0.63111	0.18933
0.63111	0.18933
0.63111	0.18933
0.63111	0.18933
0.63111	0.18933
0.63111	0.18933
0.63111	0.18933
0.63111	0.18933
0.63111	0.18933
0.63111	0.18933
0.63111	0.18933
0.63111	0.18933
0.63111	0.18933
0.63111	0.18933
0.63111	0.18933
0.63111	0.18933
0.63111	0.18933
0.63111	0.18933
0.63111	0.18933
0.68848	0.18933
0.68848	0.18933
0.68848	0.18933
0.68848	0.18933
0.71	0.18933
0.75733	0.18933
0.75733	0.18933
0.75733	0.18933
0.81143	0.18933
0.81143	0.18933
0.82833	0.18933
0.84148	0.18933
0.84148	0.18933
0.84148	0.18933
0.88356	0.18933
0.94667	0.18933
0.94667	0.18933
0.94667	0.18933
0.94667	0.18933
0.94667	0.18933
0.94667	0.284
0.94667	0.284
0.94667	0.284
0.94667	0.284
0.94667	0.284
0.94667	0.284
0.94667	0.284
0.94667	0.284
0.94667	0.284
0.94667	0.284
0.94667	0.284
0.94667	0.284
0.94667	0.284
0.94667	0.284
0.94667	0.284
0.94667	0.284
0.94667	0.284
0.94667	0.284
0.94667	0.284
0.94667	0.284
0.94667	0.284
0.94667	0.284
0.94667	0.284
0.94667	0.284
0.94667	0.284
0.94667	0.284
0.94667	0.284
0.94667	0.284
0.94667	0.284
0.94667	0.284
0.94667	0.284
1.01949	0.284
1.01949	0.284
1.0819	0.284
1.0819	0.284
1.0819	0.284
1.0819	0.284
1.10444	0.284
1.136	0.284
1.136	0.284
1.136	0.284
1.136	0.284
1.18333	0.284
1.20485	0.284
1.26222	0.37867
1.26222	0.37867
1.26222	0.37867
1.26222	0.37867
1.26222	0.37867
1.26222	0.37867
1.26222	0.37867
1.26222	0.37867
1.26222	0.37867
1.26222	0.37867
1.26222	0.37867
1.26222	0.37867
1.26222	0.37867
1.26222	0.37867
1.26222	0.37867
1.26222	0.37867
1.35238	0.37867
1.37697	0.37867
1.42	0.37867
1.42	0.37867
1.42	0.37867
1.42	0.37867
1.42	0.37867
1.42	0.37867
1.42	0.37867
1.42	0.37867
1.42	0.37867
1.42	0.37867
1.51467	0.37867
1.51467	0.37867
1.51467	0.37867
1.57778	0.37867
1.62286	0.37867
1.89333	0.37867
1.89333	0.37867
1.89333	0.37867
1.89333	0.37867
1.89333	0.37867
1.89333	0.37867
1.89333	0.37867
1.89333	0.37867
1.89333	0.47333
1.89333	0.47333
1.89333	0.47333
1.89333	0.47333
1.89333	0.47333
1.89333	0.47333
1.89333	0.47333
1.89333	0.47333
1.89333	0.47333
1.89333	0.47333
1.89333	0.47333
1.89333	0.47333
1.89333	0.47333
1.89333	0.47333
1.89333	0.47333
1.89333	0.47333
1.89333	0.568
1.89333	0.568
1.89333	0.568
1.89333	0.568
1.89333	0.568
1.89333	0.568
1.89333	0.568
1.89333	0.568
2.13	0.568
2.20889	0.568
2.20889	0.568
2.20889	0.568
2.272	0.568
2.272	0.568
2.272	0.568
2.31407	0.568
2.36667	0.568
2.36667	0.568
2.36667	0.66267
2.36667	0.66267
2.43429	0.66267
2.43429	0.66267
2.52444	0.66267
2.52444	0.66267
2.52444	0.66267
2.52444	0.66267
2.52444	0.66267
2.65067	0.66267
2.70476	0.66267
2.84	0.66267
2.84	0.66267
2.84	0.66267
2.84	0.75733
2.84	0.75733
2.84	0.75733
2.84	0.75733
3.15556	0.75733
3.15556	0.75733
3.31333	0.75733
3.31333	0.75733
3.78667	0.852
3.78667	0.852
3.78667	0.852
3.78667	0.852
3.78667	0.852
3.78667	0.852
3.78667	0.852
4.30303	0.852
4.41778	0.94667
4.41778	0.94667
4.544	0.94667
4.73333	0.94667
4.73333	0.94667
5.04889	1.04133
5.68	1.136
5.68	1.23067
5.68	1.42
5.68	1.42
5.68	1.51467
5.68	1.704
5.68	1.89333
6.15333	2.17733
6.22095	2.272
9.46667	2.36667
